# Supplementary material for: Multichromosomal Mitochondrial Genome of Paphiopedilum micranthum: Compact and Fragmented Genome, and Rampant Intracellular Gene Transfer
Source: MDPI journal article supplement (doi:10.3390/ijms24043976), 2023-02-16
Supplement: s1 [file s1]

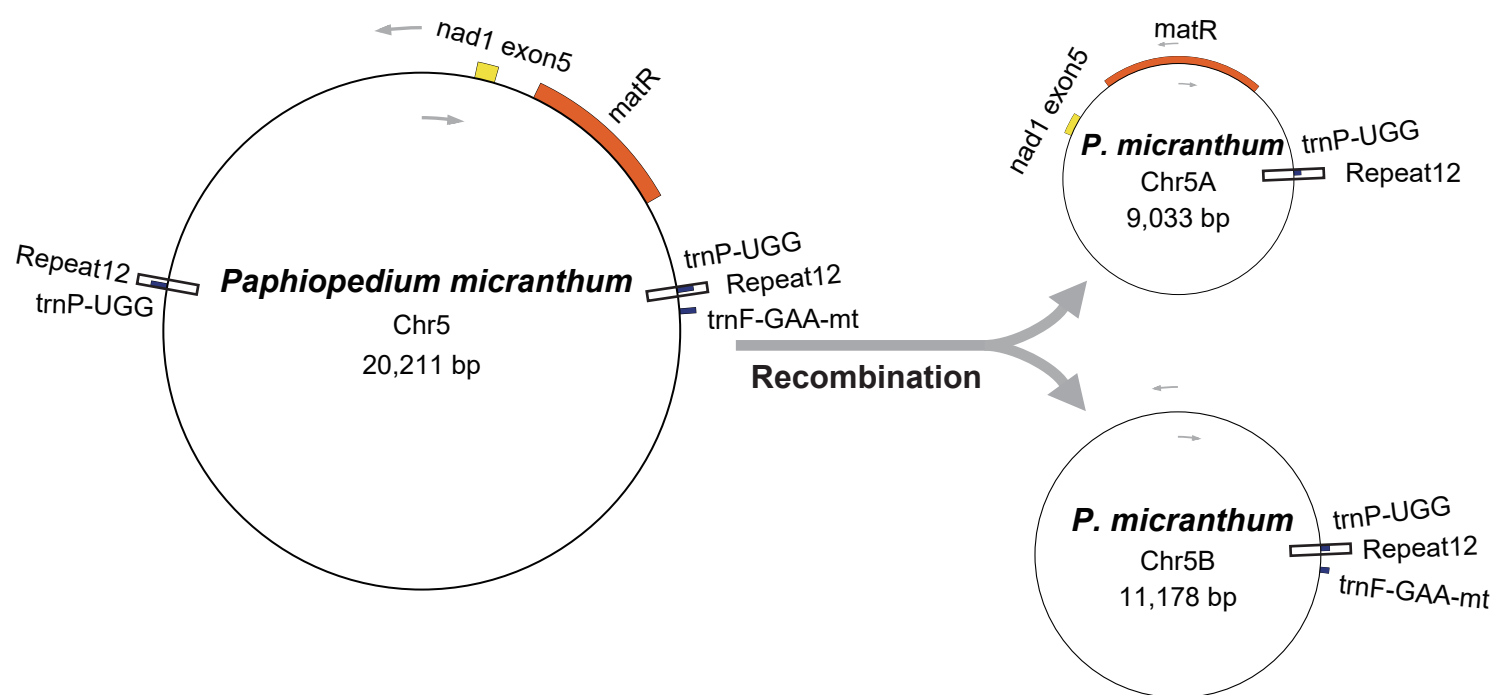

**Figure S1.** Putative circular map of two conformations of *Paphiopedium micranthum* mitogenome Chr5.
